# Supplementary material for: Syntheses, crystal structures and photoluminescent properties of silver(i) and cadmium(ii) coordination polymers constructed from flexible hexadentate di-Schiff base ligands
Source: Royal Society of Chemistry journal article supplement (doi:10.1039/c2ra21533k), 2012-01-01
Supplement: c2ra21533k.pdf [file c2ra21533k.pdf]

## Electronic Supplementary Information (ESI) for RSC Advances

# Syntheses, crystal structures and photoluminescent properties of silver(I) and cadmium(II) coordination polymers constructed from flexible hexadentate di-schiff base ligand

Jie Sun,<sup>a,b</sup> Yan-Hui Wei,<sup>b</sup> Fu-Ling Liu,<sup>b</sup> and Di Sun,<sup>\*b</sup>

<sup>a</sup>*School of Life Science, Ludong University, Yantai, 264025, Shandong, People's Republic of China.*

<sup>b</sup>*School of Chemistry and Chemical Engineering, Shandong University, Jinan, Shandong, 250100, China. E-mail: dsun@sdu.edu.cn; Fax: +86-531-88364218.*

|                                                                                      |   |
|--------------------------------------------------------------------------------------|---|
| (1) Fig. S1: IR spectra of 1 and 2 .....                                             | 2 |
| (3) Fig. S2: The TGA curves of 1 and 2. ....                                         | 3 |
| (3) Fig. S3: Absorption spectra of the free pbbpa, 1 and 2. ....                     | 4 |
| (4) Fig. S4: Emission spectrum of the free ligand pbbpa.....                         | 5 |
| (5) Scheme S1: Diverse coordination modes of NO <sub>3</sub> <sup>-</sup> in 2. .... | 6 |

(1) Fig. S1: IR spectra of 1 and 2

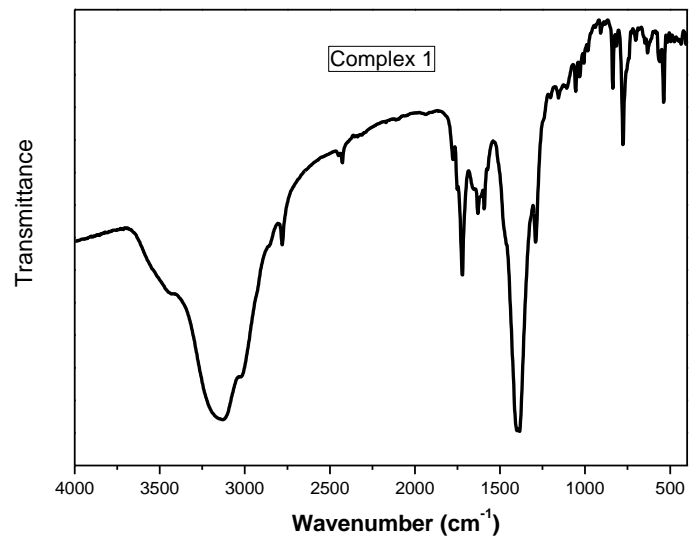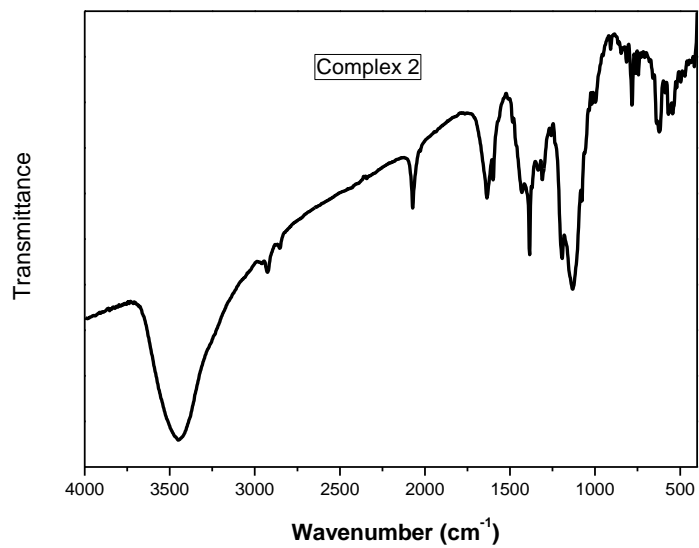

(3) Fig. S2: The TGA curves of 1 and 2.

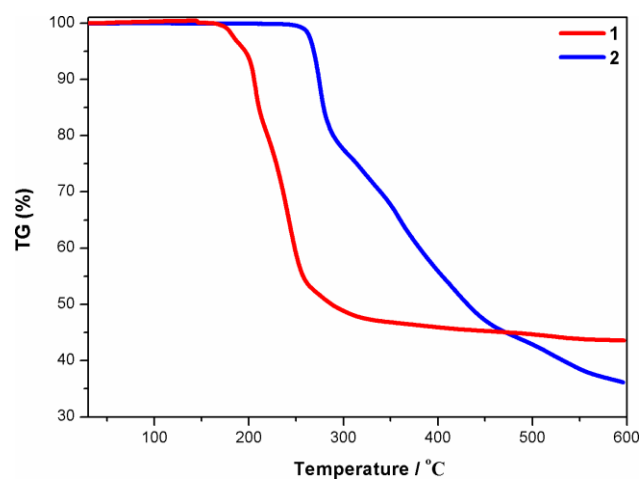

**(3) Fig. S3: Absorption spectra of the free pbbpa, 1 and 2.**

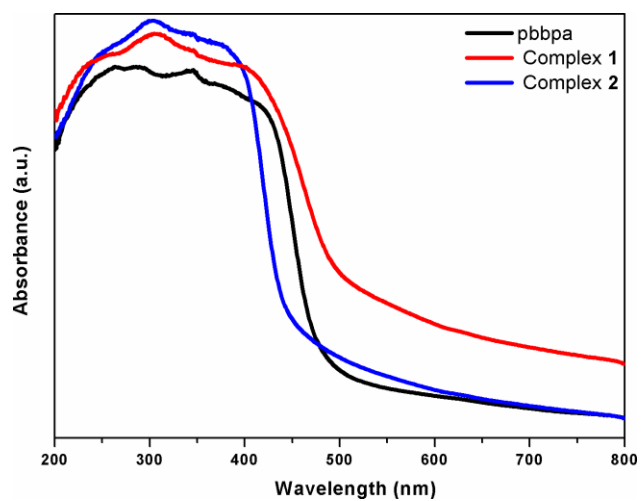

**(4) Fig. S4: Emission spectrum of the free ligand pbbpa.**

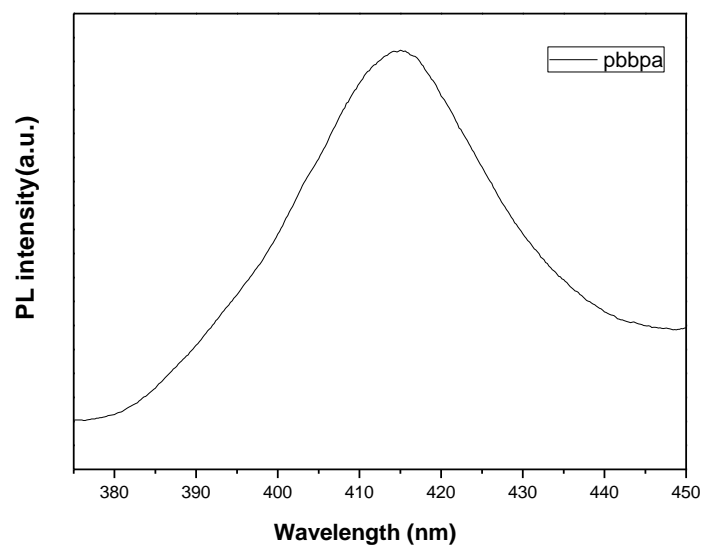

**(5) Scheme S1: Diverse coordination modes of  $\text{NO}_3^-$  in **2**.**

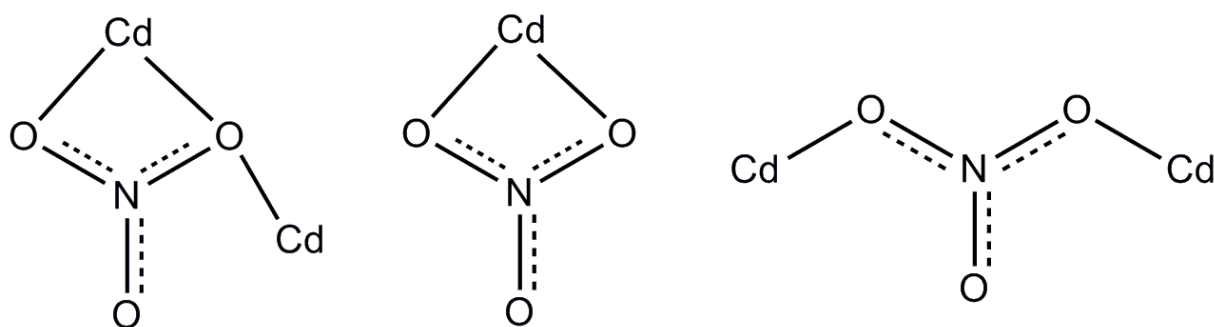

Left:  $\mu_2\text{-}\kappa^1\text{O}:\kappa^1\text{O}:\kappa^1\text{O}'$  (monodetate bridging + bidentate chelating)

Middle:  $\mu_1\text{-}\kappa^1\text{O}:\kappa^1\text{O}'$  (bidentate chelating)

Right:  $\mu_2\text{-}\kappa^1\text{O}:\kappa^1\text{O}'$  (bidentate bridging)
